RESEARCH ARTICLE

# Psychological Disorders and Psychosocial Resources of Patients with Newly Diagnosed Bladder and Kidney Cancer: A Cross-Sectional Study

Yi-Long Yang<sup>1</sup>, Li Liu<sup>1</sup>, Meng-Yao Li<sup>1</sup>, Meng Shi<sup>2</sup>, Lie Wang<sup>1\*</sup>

**1** Department of Social Medicine, School of Public Health, China Medical University, Shenyang, Liaoning, PR China, **2** Department of English, School of Basic Medicine, China Medical University, Shenyang, Liaoning, PR China

\* [liewang@mail.cmu.edu.cn](mailto:liewang@mail.cmu.edu.cn)

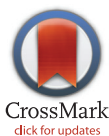

**OPEN ACCESS**

**Citation:** Yang Y-L, Liu L, Li M-Y, Shi M, Wang L (2016) Psychological Disorders and Psychosocial Resources of Patients with Newly Diagnosed Bladder and Kidney Cancer: A Cross-Sectional Study. PLoS ONE 11(5): e0155607. doi:10.1371/journal.pone.0155607

**Editor:** Bertram Müller-Myhsok, Max-Planck-Institute for Experimental Psychiatry, GERMANY

**Received:** December 21, 2015

**Accepted:** May 2, 2016

**Published:** May 18, 2016

**Copyright:** © 2016 Yang et al. This is an open access article distributed under the terms of the [Creative Commons Attribution License](https://creativecommons.org/licenses/by/4.0/), which permits unrestricted use, distribution, and reproduction in any medium, provided the original author and source are credited.

**Data Availability Statement:** All relevant data are within the paper and its Supporting Information files.

**Funding:** The authors have no support or funding to report.

**Competing Interests:** The authors have declared that no competing interests exist.

## Abstract

### Purpose

Psychological disorders have been proven to be associated with poor physiological, psychological and immune outcomes in cancer patients. However, despite of many challenges of the changed self-image/body image and the altered sexual/urinary function, relatively little is known about psychological disorders of patients with newly diagnosed bladder and kidney cancer. We aimed to investigate the prevalence of depression, anxiety, post-traumatic stress disorder (PTSD) and the associated psychosocial factors among bladder/kidney cancer patients.

### Methods

A cross-sectional study was conducted of consecutive inpatients with bladder/kidney cancer in the First Affiliated Hospital of China Medical University in Liaoning Province, northeast China. A total of 489 early-stage cancer patients eligible for this study completed questionnaires on demographic and clinical variables, depression, anxiety, PTSD, perceived social support and positive psychological variables (hope, optimism and resilience) anonymously during October 2013 and August 2014. Hierarchical regression analysis was used to examine the relationships between psychosocial resources and psychological disorders, while controlling for possible covariates.

### Results

The prevalence of depression, anxiety and PTSD was 77.5%, 69.3% and 25.2%, respectively, while 24.9% of patients had psychological co-morbidity. Psychosocial resources together explained more than one-third of the variance on psychological disorders. Under standardized estimate ( $\beta$ ) sequence, patient's perception of social support from family was significantly associated with depression, anxiety and PTSD ( $p < 0.01$ ). Optimism and

resilience showed integrated and independent effects on psychological disorders, and hope represented the significant association with PTSD only ( $p < 0.01$ ).

## Conclusions

The high prevalence of psychological disorders in newly diagnosed patients with early-stage bladder/kidney cancer should receive more attention in Chinese medical settings. Additionally, in consideration of the different protective effects of psychosocial resources, the present study demonstrated that one complete psychological intervention integrating the associated psychosocial factors are necessary to ameliorate psychological disorders so as to provide patients with a more holistic cancer care.

## Introduction

Bladder cancer and kidney cancer are common tumors of urinary system in China [1]. Compared to other malignant tumors, the incidence rate and mortality rate of bladder/kidney cancer was relatively low [2], and bladder (67.3%) and kidney cancer (62.0%) had high level of age-standardized 5-year relative survival [3]. Consequently, there has been an increasing interest with regards to the evaluation of quality of life in bladder/kidney cancer patients [4–6], such as long-term survivors, but not much is generally known regarding the mental health issues of newly diagnosed patients.

In reality, bladder/kidney cancer patients were faced with multiple stressors, including pain, fatigue, significant body changes and the altered sexual/urinary function [7,8]. Besides, intense physiological, psychological and interpersonal challenges might emerge the first year after the cancer diagnosis. All these unique characteristics might cause and aggravate patients' psychological disorders, such as depression, anxiety and post-traumatic stress disorder (PTSD), which are the most common psychological issues encountered with cancer patients [9,10]. However, there were very few studies on the evaluation of depression, anxiety and PTSD among bladder/kidney cancer patients [9,11,12]. More importantly, these psychological disorders could lead to impairment of immune response, prolonged recovery times, difficulty with symptom control, poor compliance with treatment and possibly reduced survival time [10,13,14]. Therefore, regularly screening and properly managing these psychological disorders is an important aspect of clinical oncology in these cancer patients.

Unsurprisingly, it is of great importance to identify the associated factors for psychological disorders in cancer patients, and psychosocial factors attracted great clinical attention because they could be modified through appropriate psychosocial interventions [15,16]. Although a variety of psychosocial factors have been identified as predictors of depression, anxiety and PTSD in patients diagnosed with different kinds of cancer, the unique psychological issues in bladder/kidney cancer patients might create substantial obstacles to develop effective prevention for psychological disorders. Thus, the associated protective psychosocial factors should be identified in order to develop effective strategies for depression, anxiety and PTSD.

Psychosocial factors associated with psychological disorders might be roughly divided into external and internal factors. Among external factors, research has generally shown social support to be beneficial in cancer patients, which has been extensively demonstrated to improve psychological as well as physical well-being [17,18], and to act as a buffer against stressful life events [19]. In contrast, social isolation and inadequate social support led to hopelessness, relational strain and impaired communication [20–22]. However, studies neither assessed the association between different sources of social support and psychological disorders nor clearly

distinguished which sources of social support was the essential resource for combating psychological disorders in cancer patients.

On the other hand, positive psychological factors have received increasing attention in oncology under influence of positive psychology and psycho-oncology. Our previous study has assessed the integrated effects of hope, optimism and general self-efficacy on depression/anxiety in cervical cancer patients [23], but the results were limited given the sample size ( $N = 224$ ) and gender. The present study seeks to partly replicate these results and further extend previous research by analyzing the associations between Snyder's theory of hope, resilience, optimism and psychological disorders in newly diagnosed bladder/kidney cancer patients concerning early-middle stage and gender that has relatively good representation ( $N > 400$ ).

Hope is conceptualized as goal-directed thinking and positive motivational state that consists two parts: agency (one's perception that he or she can sustain and persevere toward achieving goals) and pathways (the perceived ability to find methods or routes of reaching the desired goals) [24]. Hope is an important factor in the lives of cancer patients, including helping to adjust to cancer and reducing psychological distress [25]. Optimism also appears to be an important predictor of psychological disorders among cancer patients [26]. It is a relatively stable tendency to expect that good rather than bad things will happen, and the general positive outcome expectation can enhance the continuous efforts in achieving the given goal [27]. Compared to the constructs of hope and optimism, resilience has been more frequently studied among the people faced with traumatic events. Resilience is expressed in an individual's capacity to successfully recover and maintain their mental health in the context of traumatic events [28], and patients' resilience could influence the status of psychosocial adaptation in response to cancer [29].

Hope, optimism and resilience have been proven to be beneficial in cancer patients [24–29], and each construct represented different aspects of positive psychological resource. However, there are few studies particularly exploring their integrated and independent effects on psychological disorders when assessed together, and perceived social support and positive psychological resources were also seldom integrated into a holistic cancer care to combat depression, anxiety and PTSD. The objectives of the study were to identify the prevalence of depression, anxiety and PTSD in newly diagnosed bladder/kidney cancer patients, and to examine their associated psychosocial factors after adjusting for the demographic and clinical variables. Particularly, the present study further explored the different sources of social support and distinguished between different effects of hope, optimism and resilience on psychological disorders.

## Materials and Methods

### Study design and sample

A cross-sectional study was conducted of consecutive inpatients with bladder and kidney cancer during October 2013 and August 2014. The study took place in Department of Urology in the First Affiliated Hospital of China Medical University, which is an important provider of cancer services to a geographically defined area of 8.2 million people in the south of northeastern China. The eligibility criteria for patient recruitment were (1)  $18 \leq \text{age} < 80$  years, (2) being histologically diagnosed with bladder and kidney cancer, (3) aware of the cancer diagnosis, (4) able to understand and read Chinese well enough to answer the questionnaires, (5) newly diagnosed patients (time since diagnosis  $\leq 12$  months). Exclusion criteria were the following: (1) patients had a history of psychiatric problems before cancer diagnose, (2) patients had intellectual and/or cognitive impairments, (3) patients had other active cancers. All registered patients' attending physicians discussed eligibility on a case-by-case basis to avoid biased judgment and selection bias. After obtaining written consent, clinical data were collected from

the medical record, and a set of self-report questionnaires was distributed to patients at the time of hospitalization.

The Committee on Human Experimentation of China Medical University reviewed and provided the ethics approval for this study, and the study procedures were in accordance with the ethical standards. All of the participants provided written informed consent after being orally informed about the study protocol, and they were totally voluntary and anonymous. We protected the privacy of patients in processing personal data and maintained confidentiality of individual records and accounts. The participation in this study did not affect the future free health examination and treatment which is standard in China.

Among a total of 595 registered patients, 5 patients had other active cancers (colon cancer, prostatic cancer and neuroendocrine cancer), and there were 29 patients older than 79 years. Additionally, 12 patients were not newly diagnosed cancers. Of 549 eligible patients for this study, 60 were excluded from analysis (> 30% missing data). Finally, we received effective responses from 489 bladder and kidney cancer patients with effective response rate 89.1%.

### Measurement of depression

Center for Epidemiologic Studies Depression Scale (CES-D) is a 20-item measure of the severity of depressive symptoms [30]. Items are ranked on a four-point frequency scale from 0 (never) to 3 (always). Higher scores reflect worse depressive symptoms, and a score  $\geq 16$  indicates probable clinical depression [30,31]. The CES-D has been shown to have good reliability and validity in cancer patients [22,31]. In this study, the Cronbach's alpha for CES-D was 0.871.

### Measurement of anxiety

Zung Self-Rating Anxiety Scale (SAS) is designed to describe the presence and quantify the severity of anxiety as a clinical disorder [32]. SAS contains 20 items rated on a four-level Likert scale from 1 (not at all) to 4 (most of the time). The raw score should be standardized (raw score\*1.25), and a score of 50 (raw score is 40) or higher represents presence of anxiety symptoms [32,33]. SAS was well validated and commonly used in cancer patients, including Chinese population [33,34]. In this study, the Cronbach's alpha for SAS was 0.850.

### Measurement of PTSD

The PTSD Checklist-Civilian Version (PCL-C) assessed the PTSD symptoms criteria, including intrusion, avoidance, and hyperarousal according to the DSM-IV [35]. PCL-C is a 17-item self-rating questionnaire using a five-point Likert scale ranging from 1 (not at all) to 5 (extremely). The PCL-C yields a total score (17 to 85) with higher scores indicative of more PTSD symptoms. A total score of 50 or more suggests probable diagnosis of PTSD [36,37]. The term of 'distressing event' was replaced by the term of 'cancer or cancer treatment'. The PCL-C has shown good validity and reliability in cancer patients [17,36,37]. In this study, the Cronbach's alpha for PCL-C, intrusion, avoidance, and hyperarousal subscale was 0.953, 0.886, 0.901, and 0.920, respectively.

### Measurement of perceived social support

Multidimensional Scale of Perceived Social Support (MSPSS) [38] is 12-item measure of the sources of perceived social support, rated on a seven-point scale from 1 (very strongly disagree) to 7 (very strongly agree). It provides a summary score (12 to 84), as well as three subscales for perceived support from family, friends, and significant others. The MSPSS was validated and

commonly used in cancer patients [18,39]. In this study, the Cronbach's alpha was 0.969, 0.933, 0.917, and 0.928 respectively for MSPSS, family, friends, and significant others subscales.

### Measurement of hope

Adult Hope Scale (AHS) including eight items and four filler items rated on 4-point scales (1 = strongly disagree, 4 = strongly agree) [24]. The AHS contains four Agency and four Pathways items, and a high score denotes a higher level of pathways and agency. The hope level is the sum of the agency and pathways items. The AHS and its Chinese version have been used in cancer patients with acceptable validity and reliability [40]. The Cronbach's alpha was 0.756, 0.731, and 0.838 respectively for the pathway, agency and AHS.

### Measurement of optimism

The Life Orientation Scale-Revised (LOT-R) was used to assess optimism [26,27], including 6 items (3 positively worded and 3 negatively worded items) and 4 filler items. The responses for each range from 1 (strongly disagree) to 5 (strongly agree). Because several studies demonstrated bidimensionality (optimism and pessimism) rather than unidimensionality for the LOT-R [26], LOT-R Optimism (total of the 3 positively worded items) was calculated as the indicator of optimism in this study. The Cronbach's alpha was 0.616 for LOT-R Optimism.

### Measurement of resilience

The 14-items version of Resilience Scale (RS-14), a short version of the original RS (i.e. RS-25), was used to assess resilience [41]. RS-14 consists of 14 items rated on a 7-point scale, ranging from 1 (strongly disagree) to 7 (strongly agree). The total score ranges from 14 to 98 scores, with higher scores indicating higher resilience. The Chinese version of RS-14 had good validity and reliability among cancer patients [42]. In this study, the Cronbach's alpha was 0.947 for RS-14.

### Demographic and clinical characteristics

The demographic variables included age, gender, marital status and education. Cancer type, cancer stage, time since diagnosis (months), treatment, and metastasis were included as the clinical variables.

### Statistical analysis

The Statistical Package for the Social Sciences (SPSS, version 13.0) was used to perform the statistical analyses, with two-tailed probability value of  $< 0.05$  considered to be statistically significant. Inspection of histograms and analysis of skewness and kurtosis values for study variables revealed that data were approximately normally distributed.

Descriptive statistics of the demographic and clinical variables were indicated with median, mean, standard deviation (SD), number (N) and percentage (%) as appropriate. The distributions of CES-D, SAS and PCL-C in categorical variables were calculated using independent sample *t*-test and one way analysis of variance (ANOVA). When one-way ANOVA was found to be significant, least-significant-difference (LSD) was done to perform multiple comparisons. Pearson's correlation was used to examine correlations among psychosocial variables.

Hierarchical regression analysis was used to explore the relationship between psychosocial resources and psychological disorders with adjustment for demographics and clinical variables related to psychological disorders in univariate analysis ( $p < 0.05$ ). In Step 1, age, gender, education, time since diagnosis and cancer stage were added. There were two models (Model 1 and

Model 2) in Step 2. Total score of MSPSS was added in Model 1, and three subscales of MSPSS (e.g., others, friend and family) were added in Model 2. Due to the high correlations among the MSPSS subscales, these variables were adjusted in the stepwise regression in Step 2 (Model 2). Hope, optimism and resilience were added in Step 3. We provided data including  $R^2$ , adjusted  $R^2$  (Adj. $R^2$ ),  $R^2$ -changes, F, standardized regression coefficient ( $\beta$ ) and  $p$  value for each step in the regression model. Moreover, tolerance ( $> 0.10$ ) and variance inflation factor ( $< 5$ ) were used to check for multicollinearity.

## Results

[Table 1](#) presented patients characteristics. The patients ( $N = 489$ ) were in the age range of 18–79 (Mean  $\pm$  SD:  $59.10 \pm 11.28$ ). Approximately 90% of the patients were married or living with a partner, and 48.7% received middle school education. The mean number of months after diagnosis was 6.04 (range: 1–12). Majority of patients (58.3%) were diagnosed at cancer stage I, and 99.4% were free of metastases. The prevalence of depression, anxiety and PTSD in bladder/kidney cancer patients was 77.5%, 69.3% and 25.2%, and 24.9% ( $N = 122$ ) of patients had psychological co-morbidity (i.e., triad symptoms of depression, anxiety and PTSD).

[Table 2](#) revealed the depression, anxiety and PTSD scores in demographic and clinical variables. Education, cancer stage and time since diagnosis were significantly associated with depression, anxiety and PTSD ( $p < 0.05$ ). Table A in [S1 Appendix](#) also indicated the association between psychosocial resources and cancer type. The level of social support from friends was higher in kidney cancer patients than that of bladder cancer patients. The intercorrelations between study variables were shown in [Table 3](#). Perceived social support and positive psychological resources were negatively associated with depression, anxiety and PTSD ( $r =$  ranged from -0.361 to -0.481;  $p < 0.01$ ).

Tables 4–6 indicated the final results of the hierarchical regression analyses of depression, anxiety and PTSD after adjusting for demographic and clinical variables. Psychosocial resources together accounted for an additional variance of depression (34.9%), anxiety (34.4%) and PTSD (33.3%). Perceived social support-family was the only external resources of depression ( $\beta = -0.143$ ,  $p = 0.001$ ), anxiety ( $\beta = -0.206$ ,  $p < 0.001$ ), and PTSD ( $\beta = -0.170$ ,  $p < 0.001$ ). Both optimism and resilience were significantly associated with depression, anxiety and PTSD, respectively, and hope showed significantly independent effect on PTSD ( $\beta = -0.153$ ,  $p = 0.001$ ) when they entered into regression together. Tolerance (range: 0.557–0.981) and variance inflation (range: 1.019–1.794) did not indicate an obvious multicollinearity problem.

Additionally, the related analyses were conducted specifically with bladder cancer in our study. Tables B-D in [S1 Appendix](#) presented the study variables scores in clinical variables (i.e., cancer stage, surgical methods and recurrent), and Tables E-G in [S1 Appendix](#) indicated the association between psychosocial resources and psychological disorders in bladder cancer patients with stage I or stage II after adjusting for covariates.

## Discussion

This is the first comprehensive cross-sectional study to explore the prevalence and associated psychosocial resources of depression, anxiety and PTSD among bladder and kidney cancer patients.

Our previous studies found that depression and anxiety coexisted in Chinese cancer patients [9,23]. In the present study, approximately one-fourth of patients (24.9%) experienced psychological co-morbidity, indicating that depression, anxiety and PTSD also coexisted among bladder and kidney cancer patients. This is noteworthy because co-morbid psychological disorder tended to have severe symptoms, poorer outcomes and greater use of healthcare resources than

**Table 1. Patient Characteristics (N = 489).**

|                                         | N   | %    | Mean (SD)    | Median (Range) |
|-----------------------------------------|-----|------|--------------|----------------|
| <b>Demographic variables</b>            |     |      |              |                |
| Age (years)                             |     |      | 59.10(11.28) | 60.00(18–79)   |
| ≤ 55                                    | 170 | 34.8 |              |                |
| 56–65                                   | 164 | 33.5 |              |                |
| ≥ 66                                    | 155 | 31.7 |              |                |
| Gender                                  |     |      |              |                |
| Male                                    | 345 | 70.6 |              |                |
| Female                                  | 144 | 29.4 |              |                |
| Marital status                          |     |      |              |                |
| Married/ cohabitation                   | 437 | 89.4 |              |                |
| Single/widowed/divorced                 | 52  | 10.6 |              |                |
| Education                               |     |      |              |                |
| Middle school or below                  | 238 | 48.7 |              |                |
| High school                             | 126 | 25.8 |              |                |
| Junior college or above                 | 125 | 25.6 |              |                |
| <b>Clinical variables</b>               |     |      |              |                |
| Cancer type                             |     |      |              |                |
| Bladder cancer                          | 244 | 49.9 |              |                |
| Kidney cancer                           | 245 | 50.1 |              |                |
| Time since diagnosis (months)           |     |      | 6.04 (3.55)  | 5.00(1–12)     |
| ≤ 3                                     | 149 | 30.5 |              |                |
| 4–6                                     | 143 | 29.2 |              |                |
| 7–12                                    | 197 | 40.3 |              |                |
| Cancer stage                            |     |      |              |                |
| I                                       | 285 | 58.3 |              |                |
| II                                      | 204 | 41.7 |              |                |
| Treatment type                          |     |      |              |                |
| No treatment                            | 4   | 0.8  |              |                |
| Surgery                                 | 294 | 51.9 |              |                |
| Chemotherapy                            | 1   | 0.2  |              |                |
| Combined treatment                      | 230 | 47.0 |              |                |
| Metastasis                              |     |      |              |                |
| No                                      | 486 | 99.4 |              |                |
| Yes                                     | 3   | 0.6  |              |                |
| Recurrent                               |     |      |              |                |
| Yes                                     | 14  | 2.9  |              |                |
| No                                      | 475 | 97.1 |              |                |
| CES-D (Scores ≥ 16)                     | 379 | 77.5 |              |                |
| SAS (Scores ≥ 50) <sup>a</sup>          | 339 | 69.3 |              |                |
| PCL-C (Scores ≥ 50)                     | 123 | 25.2 |              |                |
| Psychological co-morbidity <sup>b</sup> | 122 | 24.9 |              |                |

CES-D = Center for Epidemiologic Studies Depression Scale; SAS = Zung Self-Rating Anxiety Scale; PCL-C = Posttraumatic Stress Disorder Checklist-Civilian Version.

<sup>a</sup> Standard score was used.

<sup>b</sup> Patients suffered from both depression, anxiety and PTSD.

doi:10.1371/journal.pone.0155607.t001

**Table 2. CES-D, SAS, PCL-C scores in demographic and clinical variables.**

|                              | CES-D                    | p-value | SAS                      | p-value | PCL-C                    | p-value |
|------------------------------|--------------------------|---------|--------------------------|---------|--------------------------|---------|
| <b>Demographic variables</b> |                          |         |                          |         |                          |         |
| Age                          |                          | 0.806   |                          | 0.586   |                          | 0.307   |
| ≤ 55                         | 23.17±9.63               |         | 43.98±9.15               |         | 37.42±13.99              |         |
| 56–65                        | 23.78±8.51               |         | 44.82±9.03               |         | 39.51±12.59              |         |
| ≥ 66                         | 23.20±9.96               |         | 43.81±9.94               |         | 37.72±13.21              |         |
| Gender                       |                          | 0.309   |                          | 0.616   |                          | 0.670   |
| Male                         | 23.11±9.42               |         | 44.07±9.38               |         | 38.05±13.43              |         |
| Female                       | 24.05±9.22               |         | 44.54±9.35               |         | 38.61±12.98              |         |
| Marital status               |                          | 0.534   |                          | 0.925   |                          | 0.583   |
| Married/ cohabitation        | 23.29±9.32               |         | 44.22±9.32               |         | 38.11±13.45              |         |
| Single/widowed/divorced      | 24.15±9.77               |         | 44.09±9.81               |         | 39.09±11.91              |         |
| Education                    |                          | 0.001   |                          | <0.001  |                          | 0.002   |
| Middle school or below       | 23.93±9.26 <sup>a</sup>  |         | 44.58±9.03 <sup>a</sup>  |         | 38.95±12.83 <sup>a</sup> |         |
| High school                  | 24.86±8.22 <sup>a</sup>  |         | 46.22±8.29 <sup>a</sup>  |         | 40.34±12.76 <sup>a</sup> |         |
| Junior college or above      | 20.85±10.19 <sup>b</sup> |         | 41.48±10.39 <sup>b</sup> |         | 34.68±14.08 <sup>b</sup> |         |
| <b>Clinical variables</b>    |                          |         |                          |         |                          |         |
| Cancer type                  |                          | 0.766   |                          | 0.506   |                          | 0.359   |
| Bladder cancer               | 23.26±9.41               |         | 43.93±9.63               |         | 38.77±13.29              |         |
| Kidney cancer                | 23.51±9.33               |         | 44.49±9.10               |         | 37.66±13.29              |         |
| Time since diagnosis         |                          | 0.014   |                          | 0.010   |                          | 0.001   |
| ≤ 3                          | 25.09±8.36 <sup>a</sup>  |         | 46.06±8.43 <sup>a</sup>  |         | 41.61±12.33 <sup>a</sup> |         |
| 4–6                          | 23.34±9.01               |         | 43.90±9.87 <sup>b</sup>  |         | 37.41±13.28 <sup>b</sup> |         |
| 7–12                         | 22.12±10.14 <sup>b</sup> |         | 43.03±9.48 <sup>b</sup>  |         | 36.24±13.57 <sup>b</sup> |         |
| Treatment                    |                          | 0.366   |                          | 0.803   |                          | 0.795   |
| Combined treatment           | 23.77±8.96               |         | 44.30±9.51               |         | 38.04±13.16              |         |
| Surgery                      | 23.00±9.77               |         | 44.09±9.29               |         | 38.36±13.48              |         |
| Cancer stage                 |                          | 0.012   |                          | 0.008   |                          | 0.002   |
| I                            | 22.49±9.55               |         | 43.27±9.62               |         | 36.62±12.90              |         |
| II                           | 24.64±8.96               |         | 45.51±8.84               |         | 40.44±13.53              |         |
| Recurrent                    |                          | 0.085   |                          | 0.148   |                          | 0.966   |
| Yes                          | 19.14±10.38              |         | 40.64±10.75              |         | 38.07±13.86              |         |
| No                           | 23.51±9.32               |         | 44.32±9.32               |         | 38.23±13.29              |         |

CES-D = Center for Epidemiologic Studies Depression Scale; SAS = Zung Self-Rating Anxiety Scale; PCL-C = Posttraumatic Stress Disorder Checklist-Civilian Version.

<sup>a,b</sup> Calculated by least-significant-difference (LSD), mean scores for depression, anxiety and PTSD with unequal superscripts differ significantly at the  $p < 0.05$  level.

Independent sample *t*-test and one-way ANOVA were used.

doi:10.1371/journal.pone.0155607.t002

those with a single disorder [43]. Additionally, the prevalence of depression-anxiety comorbidity in this study (68.5%) was higher than the results of our previous empirical study in cervical cancer patients (45.5%) [23].

The prevalence of depression, anxiety and PTSD was 77.5%, 69.3% and 25.2% in bladder and kidney cancer patients, respectively, which was higher than the findings of previous studies using the same scales and cut-off score among different kinds of cancer, including prostate cancer, breast cancer, and ovarian cancer [31,34,36,37,44,45]. There might be two reasons for the different prevalence. First, according to the previous literatures, patients with bladder/kidney



**Table 3. Means, standard deviation, range and zero-order correlations (Pearson's r) among study variables.**

| Variables         | Mean ± SD       | Test Range | Sample Range | 1 | 2       | 3       | 4        | 5        | 6        | 7        | 8        | 9        | 10       |
|-------------------|-----------------|------------|--------------|---|---------|---------|----------|----------|----------|----------|----------|----------|----------|
| 1. CES-D          | 23.38±9.36      | 0–60       | 0–44         | 1 | 0.864** | 0.782** | -0.408** | -0.393** | -0.411** | -0.361** | -0.430** | -0.481** | -0.479** |
| 2. SAS            | 44.21±9.36      | 20–80      | 20–66        |   | 1       | 0.774** | -0.438** | -0.427** | -0.450** | -0.372** | -0.432** | -0.464** | -0.468** |
| 3. PCL-C          | 38.22<br>±13.29 | 17–85      | 17–75        |   |         | 1       | -0.422** | -0.409** | -0.425** | -0.370** | -0.453** | -0.457** | -0.440** |
| 4. Total-MSPSS    | 58.42<br>±17.28 | 12–84      | 20–84        |   |         |         | 1        | 0.964**  | 0.963**  | 0.931**  | 0.481**  | 0.353**  | 0.506**  |
| 5. MSPSS-others   | 19.40±6.11      | 4–28       | 4–28         |   |         |         |          | 1        | 0.916**  | 0.838**  | 0.457**  | 0.370**  | 0.491**  |
| 6. MSPSS-family   | 20.12±6.27      | 4–28       | 6–28         |   |         |         |          |          | 1        | 0.833**  | 0.457**  | 0.348**  | 0.488**  |
| 7. MSPSS-friend   | 18.89±5.74      | 4–28       | 6–28         |   |         |         |          |          |          | 1        | 0.462**  | 0.288**  | 0.468**  |
| 8. AHS            | 21.64±4.45      | 8–32       | 8–32         |   |         |         |          |          |          |          | 1        | 0.443**  | 0.569**  |
| 9. LOT-R Optimism | 10.09±2.07      | 3–15       | 5–15         |   |         |         |          |          |          |          |          | 1        | 0.376**  |
| 10. RS-14         | 64.89<br>±17.11 | 14–98      | 14–98        |   |         |         |          |          |          |          |          |          | 1        |

CES-D = Center for Epidemiologic Studies Depression Scale; SAS = Zung Self-Rating Anxiety Scale; PCL-C = Posttraumatic Stress Disorder Checklist-Civilian Version; MSPSS = Multidimensional Scale of Perceived Social Support; AHS = Adult Hope Scale; LOT-R = Life Orientation Scale-Revised; RS-14 = 14-items version of Resilience Scale

\*\* Correlation is significant at the 0.01 level (two-tailed).

doi:10.1371/journal.pone.0155607.t003

cancer were mainly faced with the changed self-image/body image and the altered sexual/urinary function, which might have an adverse impact on their psychological well-beings. Besides, these patients might also face the physiological, psychological and interpersonal challenges across the first year after the cancer diagnosis. Second, cancer patients of the above studies [31,34,36,37,44,45] were mainly from developed countries which may have lower prevalence of psychological disorders as compared to developing countries like China [46]. Several studies indicated the high prevalence of depression and anxiety in Chinese cancer patients using a variety of self-report questionnaires [9,23,33]. Compared with the developed countries, clinical practice guidelines for the psychotherapy and supportive care of cancer patients are still not available in China [16]. Therefore, the above situations, combined with the psychological issues that received little attention, might aggravate psychological disorders in patients across the first year after diagnosed with bladder/kidney cancer.

The present study found that a relatively few patients were identified as likely to experience PTSD symptoms, although the prevalence of PTSD symptoms was higher than that in other studies using the same cut-off score (PTSD score ≥ 50) [36,37]. The low prevalence of PTSD (ranging from 3% to 35%) has been found in cancer patients [21], and our findings also seemed to support that although psychological disorder is the major issue and challenge in taking care of cancer patients, a definite portion of patients could successfully deal with cancer-related PTSD.

One of the core findings in this study was that psychosocial resources together explained more than one-third of the variance on psychological disorders, and perceived social support and positive psychological resources showed significant negative association with psychological disorders ( $p < 0.01$ ). Most studies to date mainly focused on the independent effect of internal or external factors on reducing psychological disorders [17,18,26,28,40], and ignored, to some

**Table 4. Hierarchical regression analyses for psychosocial resources predicting depression.**

| Variables                       | Step 1(β) | Step 2(β) |           | Step 3(β) |           |
|---------------------------------|-----------|-----------|-----------|-----------|-----------|
|                                 |           | Model 1   | Model 2   | Model 1   | Model 2   |
| <b>Covariates</b>               |           |           |           |           |           |
| Age                             | 0.014     | 0.006     | 0.018     | 0.036     | 0.040     |
| Gender                          | 0.038     | 0.048     | 0.049     | 0.048     | 0.049     |
| Education1                      | 0.145**   | 0.052     | 0.052     | 0.019     | 0.016     |
| Education2                      | 0.171**   | 0.105*    | 0.113*    | 0.027     | 0.029     |
| Time since diagnosis            | -0.123**  | -0.053    | -0.048    | -0.020    | -0.016    |
| Cancer stage                    | 0.076     | 0.048     | 0.045     | 0.038     | 0.036     |
| <b>Predictors (external)</b>    |           |           |           |           |           |
| Perceived social support        |           | -0.378*** |           | -0.127**  |           |
| Perceived social support-others |           |           | -         |           | -         |
| Perceived social support-family |           |           | -0.384*** |           | -0.143**  |
| Perceived social support-friend |           |           | -         |           | -         |
| <b>Predictors (internal)</b>    |           |           |           |           |           |
| Hope                            |           |           |           | -0.077    | -0.076    |
| Optimism                        |           |           |           | -0.304*** | -0.301*** |
| Resilience                      |           |           |           | -0.244*** | -0.241*** |
| <b>F</b>                        | 4.544***  | 15.389*** | 15.770*** | 27.116*** | 27.507*** |
| <b>R<sup>2</sup></b>            | 0.054     | 0.183     | 0.187     | 0.362     | 0.365     |
| <b>Adj.R<sup>2</sup></b>        | 0.042     | 0.171     | 0.175     | 0.349     | 0.352     |
| <b>R<sup>2</sup>-changes</b>    | 0.054     | 0.129     | 0.133     | 0.179     | 0.179     |

β = standardized regression coefficient; Education1 = Middle school or below vs. Junior college or above; Education2 = High school vs. Junior college or above; Adj.R<sup>2</sup> = adjusted R<sup>2</sup>.

\* *p* < 0.05

\*\* *p* < 0.01

\*\*\* *p* < 0.001

There were two models (Model 1 and Model 2) in Step 2. Total score of social support was added in Model 1, and three subscales (i.e., others, friend and family) were added in Model 2 adjusted by the stepwise regression due to the high correlations among the MSPSS subscales

doi:10.1371/journal.pone.0155607.t004

extent, the integrated effects of internal and external resources. The present scarcity in the study of psychological issues among bladder/kidney cancer patients provided such a suitable platform to investigate the relationship between psychosocial resources and psychological disorders.

We found that perceived social support (total score) was significantly and negatively associated with psychological disorders (*p* < 0.01), and this findings converged with results from other studies in cancer patients [18,22]. However, when different sources of social support were further explored, an interesting finding was that only social support from family was significantly associated with depression, anxiety and PTSD (*p* < 0.01), contrary to the general conclusion that friends and significant others were also primary sources of support for cancer patients [18,22]. We speculated that in Chinese society, people generally have stronger sense of belonging to a family, and family members can support each other emotionally and financially. Especially in the context of traumatic events, people feel responsible for looking after their relatives, and the care and concern of family members might be of great importance for patients. Additionally, psychosocial interventions involving family member have been proven to be beneficial for depression in cancer patients [47]. On the other hand, bladder and kidney cancer patients might not get enough supports from friends and significant others. Due to the adverse

**Table 5. Hierarchical regression analyses for psychosocial resources predicting anxiety.**

| Variables                       | Step 1(β) | Step 2(β) |           | Step 3(β) |           |
|---------------------------------|-----------|-----------|-----------|-----------|-----------|
|                                 |           | Model 1   | Model 2   | Model 1   | Model 2   |
| <b>Covariates</b>               |           |           |           |           |           |
| Age                             | -0.002    | -0.010    | 0.003     | 0.014     | 0.020     |
| Gender                          | 0.016     | 0.027     | 0.029     | 0.027     | 0.029     |
| Education1                      | 0.149**   | 0.049     | 0.047     | 0.017     | 0.013     |
| Education2                      | 0.205***  | 0.134**   | 0.142**   | 0.065     | 0.067     |
| Time since diagnosis            | -0.130**  | -0.055    | -0.048    | -0.025    | -0.020    |
| Cancer stage                    | 0.078     | 0.048     | 0.045     | 0.040     | 0.037     |
| <b>Predictors (external)</b>    |           |           |           |           |           |
| Perceived social support        |           | -0.407*** |           | -0.178*** |           |
| Perceived social support-others |           |           | -         |           | -         |
| Perceived social support-family |           |           | -0.422*** |           | -0.206*** |
| Perceived social support-friend |           |           | -         |           | -         |
| <b>Predictors (internal)</b>    |           |           |           |           |           |
| Hope                            |           |           |           | -0.089    | -0.087    |
| Optimism                        |           |           |           | -0.268*** | -0.264*** |
| Resilience                      |           |           |           | -0.209*** | -0.203*** |
| <b>F</b>                        | 5.360***  | 18.512*** | 19.765*** | 26.543*** | 27.458*** |
| <b>R<sup>2</sup></b>            | 0.063     | 0.212     | 0.223     | 0.357     | 0.365     |
| <b>Adj.R<sup>2</sup></b>        | 0.051     | 0.201     | 0.212     | 0.344     | 0.352     |
| <b>R<sup>2</sup>-changes</b>    | 0.063     | 0.150     | 0.161     | 0.145     | 0.141     |

β = standardized regression coefficient; Education1 = Middle school or below vs. Junior college or above; Education2 = High school vs. Junior college or above; Adj.R<sup>2</sup> = adjusted R<sup>2</sup>.

\*\* p < 0.01

\*\*\* p < 0.001

There were two models (Model 1 and Model 2) in Step 2. Total score of social support was added in Model 1, and three subscales (i.e., others, friend and family) were added in Model 2 adjusted by the stepwise regression due to the high correlations among the MSPSS subscales

doi:10.1371/journal.pone.0155607.t005

effects of changed self-image/body image and altered sexual/urinary function, patients might distance themselves from friends and others as they are afraid of losing affected person in their social network, and they do not know how to ask for help because of their embarrassment [39,48]. Friends and significant others might also avoid them because they feel awkward and hardly know what to do and say when they encounter these patients [48]. As a result, support from family members played an important or even the only role in ameliorating psychological disorders among bladder/kidney cancer patients.

Due to the association between cancer stage and treatment patterns specifically with bladder cancer, the analysis of patients with bladder cancer that have stage I or II was separated (Tables E-G in [S1 Appendix](#)). Perceived social support-family was the only external resources of psychological disorders among bladder cancer patients with stage I, while only social support from others was significantly associated with psychological disorders among patients with stage II. These differences might be ultimately attributed to the discrepancy in treatment patterns. Bladder cancer patients with stage I were mainly treated with transurethral resection of bladder tumor (TURBT), and patients with stage II were partial or total cystectomy[49]. In general status of working and social contact, patients with TURBT might be less affected by the treatment than patients treated by cystectomy. We speculated that perceived support form others (e.g., colleagues and relatives) by patients with cystectomy might offer a sense of hope and

**Table 6. Hierarchical regression analyses for psychosocial resources predicting PTSD.**

| Variables                       | Step 1(β) | Step 2(β) |           | Step 3(β) |           |
|---------------------------------|-----------|-----------|-----------|-----------|-----------|
|                                 |           | Model 1   | Model 2   | Model 1   | Model 2   |
| <b>Covariates</b>               |           |           |           |           |           |
| Age                             | 0.029     | 0.021     | 0.033     | 0.041     | 0.046     |
| Gender                          | 0.012     | 0.021     | 0.023     | 0.022     | 0.023     |
| Education1                      | 0.142**   | 0.047     | 0.047     | 0.012     | 0.010     |
| Education2                      | 0.167**   | 0.100*    | 0.108*    | 0.029     | 0.032     |
| Time since diagnosis            | -0.150**  | -0.079    | -0.074    | -0.050    | -0.046    |
| Cancer stage                    | 0.098*    | 0.070     | 0.067     | 0.062     | 0.060     |
| <b>Predictors (external)</b>    |           |           |           |           |           |
| Perceived social support        |           | -0.384*** |           | -0.154**  |           |
| Perceived social support-others |           |           | -         |           | -         |
| Perceived social support-family |           |           | -0.390*** |           | -0.170*** |
| Perceived social support-friend |           |           | -         |           | -         |
| <b>Predictors (internal)</b>    |           |           |           |           |           |
| Hope                            |           |           |           | -0.153**  | -0.153**  |
| Optimism                        |           |           |           | -0.263*** | -0.260*** |
| Resilience                      |           |           |           | -0.156**  | -0.153**  |
| <b>F</b>                        | 5.718***  | 17.128*** | 17.532*** | 25.318*** | 25.759*** |
| <b>R<sup>2</sup></b>            | 0.066     | 0.200     | 0.203     | 0.346     | 0.350     |
| <b>Adj.R<sup>2</sup></b>        | 0.055     | 0.188     | 0.192     | 0.333     | 0.337     |
| <b>R<sup>2</sup>-changes</b>    | 0.066     | 0.133     | 0.137     | 0.147     | 0.147     |

β = standardized regression coefficient; Education1 = Middle school or below vs. Junior college or above; Education2 = High school vs. Junior college or above; Adj.R<sup>2</sup> = adjusted R<sup>2</sup>.

\* p < 0.05

\*\* p < 0.01

\*\*\* p < 0.001

There were two models (Model 1 and Model 2) in Step 2. Total score of social support was added in Model 1, and three subscales (i.e., others, friend and family) were added in Model 2 adjusted by the stepwise regression due to the high correlations among the MSPSS subscales

doi:10.1371/journal.pone.0155607.t006

confidence, resulting in greater chance to connect with others and engage in social activities, which might further relieve psychological disorders.

After controlling for perceived social support, positive psychological variables also accounted for an additional proportion of variance to depression (17.9%), anxiety (14.5%) and PTSD (14.7%). Optimism and resilience were the independent factors of psychological disorders, which partially supported our previous studies [23] and suggested the protective effects of optimism and resilience in cancer patients. Optimism and resilience as a whole might alleviate psychological disorders by enabling patients to expect positive outcomes and maintain the efforts to attain the health-related goals [26,27], and to mobilize the individual's resources to successfully maintain or recover their mental health in the face of bladder/kidney cancer [28,29]. Especially among bladder cancer patients with stage II, optimism was the only internal resource of anxiety and PTSD, indicating that optimism might trump the impacts of resilience on anxiety disorders (Tables E and G in S1 Appendix). Although the causal inference could not be drawn from the cross-sectional design, both positive expectancies regarding favorable outcomes in one's own future (optimism) and positive adaptation in the context of traumatic events (resilience) were important to successfully ameliorate depression, anxiety and PTSD in bladder/kidney cancer patients.

An interesting and important finding was that when positive psychological variables entered into regression model together, hope represented the significant association with PTSD only, which might be mainly caused by Snyder's theory of hope that interacted with PTSD and the difference among psychological disorders. PTSD refers to the psychological symptoms (e.g., intrusive cognitions, avoidance and hyperarousal) caused exclusively by the experience of cancer diagnosis and treatment [10], which is different from depression and anxiety (or more precisely of generalized anxiety disorder) that mainly reflect a variety of emotional states, such as unpleasant, worried, negative and hopeless, about individuals' lives, the world and the future, without reference to specific events [9,23]. Additionally, in Snyder's theory, hope was considered as goal-directed or problem-directed thinking, including planning to meet goals (pathways) and goal directed energy (agency) [24]. Cancer patients with high level of hope might be able to find solutions to issues caused by cancer and feel confident that they can utilize pathways to solve or cope with those issues. Therefore, hope showed significantly special and targeted association with PTSD, which might provide valuable insight into developing targeted psychotherapy toward cancer patients' PTSD based on Snyder's theory of hope.

### Implication

There are several implications in our study. In theory, a whole new perspective would be provided for researchers to build an integrated model to combat psychological disorders in cancer patients by including both perceived social support and positive psychological resources. Furthermore, hope in Snyder's theory might be an important resource to alleviate PTSD in patients with bladder/kidney cancer [24]. In practice, the high prevalence of depression, anxiety and PTSD in newly diagnosed bladder/kidney cancer patients should receive sufficient attention in Chinese medical settings. The findings in our study also suggest that comprehensive care, including social support from family and psychological resources, is indispensable for bladder/kidney cancer patients. For instance, Cicero et al. pointed out that family members might feel ambivalence towards the cancer patients and engage in unhelpful defenses such as withdrawal and criticism [39]. Therefore, doctors should make clear statement about patients' illness and patiently communicate with patients and their families. Family members should try to provide reassurance and spend time with patients rather than avoidance and withdrawal. On the other hand, previous studies indicated that hope, optimism and resilience can be enhanced through specific psychotherapy interventions [23,50–52]. As described in detail previously [53], the psychosocial interventions should improve optimism by considering the patients' situation- or treatment-specific expectations. As introduced in a recent review [50], stress management, resilience training and interventions (e.g., meaning-making interventions) that targeted other aspects of the cancer experience might directly or indirectly improve resilience [51]. Based on Snyder's theory of hope and the findings of previous studies, Berendes et al. developed a psychosocial intervention module which includes the following key components, 1) discussion on patients' objective understanding of their disease, 2) recognition of goals and ordering of importance of goals, 3) recognition of realistic short- and long-term goals achievable within the situation of bladder/kidney cancer, 4) confirmation of all the potential pathways toward goals and choosing the most likely pathway to success, and 5) measures to boost agency and monitor pathways [40,52].

### Limitation

Our study had several limitations. First, we used a convenience sample from one oncology center, so generalization from the present results should be attempted with caution. Second, depression, anxiety and PTSD measured by the self-report questionnaires mainly referred to

depressive symptom, anxiety symptom and PTSD symptoms in this study. Third, further studies need to be conducted to examine whether the results of the present study are suitable to the different cultural context and other cancer samples. Fourth, besides perceived social support, hope, optimism and resilience, internal and external resources related to psychological disorders should be further explored. Finally, this study was based on cross-sectional design. Thus, causality cannot be implied from the results. Further longitudinal studies are needed to validate the current findings.

## Conclusions

The present study found the high prevalence of depression, anxiety and PTSD among newly diagnosed patients with early-stage bladder/kidney cancer and identified the associated psychosocial factors. Particularly, patient's perception of social support from family was the only external resource of psychological disorders. Optimism and resilience when to be assessed together showed integrated and independent effects on psychological disorders while hope showed significantly special and targeted association with PTSD. The findings provides a whole new perspective for future research building an integrated model by synthesizing the associated psychosocial resources in cancer patients so as to advocate the role of the integrated psychosocial interventions based on our findings in oncology field.

## Supporting Information

### S1 Appendix. Supplementary tables.

(DOC)

### S2 Appendix. The raw data of the present study.

(XLS)

## Acknowledgments

The authors would like to thank all the administrators in First Affiliated Hospital of China Medical University who helped to get the written informed consent about the conduct of this survey and to distribute the questionnaires to the subjects. We also thank all patients voluntarily participating in this study.

## Author Contributions

Conceived and designed the experiments: YLY LL. Performed the experiments: LW. Analyzed the data: LL MYL MS. Contributed reagents/materials/analysis tools: LW. Wrote the paper: YLY.

## References

1. Stewart BW, Wild CP. World Cancer Report 2014. Switzerland: WHO Press; 2014.
2. Chen W, Zheng R, Zhang S, Zhao P, Li G, Wu L, et al. Report of incidence and mortality in China cancer registries, 2009. *Chin J Cancer Res.* 2013; 25: 10–21. doi: [10.3978/j.issn.1000-9604.2012.12.04](https://doi.org/10.3978/j.issn.1000-9604.2012.12.04) PMID: [23372337](https://pubmed.ncbi.nlm.nih.gov/23372337/)
3. Zeng H, Zheng R, Guo Y, Zhang S, Zou X, Wang N, et al. Cancer survival in China, 2003–2005: A population-based study. *Int J Cancer.* 2014; 136: 1921–1930. doi: [10.1002/ijc.29227](https://doi.org/10.1002/ijc.29227) PMID: [25242378](https://pubmed.ncbi.nlm.nih.gov/25242378/)
4. Bird J, Hayter M. A review of the literature on the impact of renal cancer therapy on quality of life. *J Clin Nurs.* 2009; 18: 2783–2800. doi: [10.1111/j.1365-2702.2009.02875.x](https://doi.org/10.1111/j.1365-2702.2009.02875.x) PMID: [19747253](https://pubmed.ncbi.nlm.nih.gov/19747253/)
5. Beisland C, Beisland E, Hjielle KM, Bostad L, Hjermstad MJ, Aarstad AKH, et al. Health-related quality of life in long-term survivors after renal cancer treatment. *Scand J Urol.* 2014; 48: 52–64. doi: [10.3109/21681805.2013.813963](https://doi.org/10.3109/21681805.2013.813963) PMID: [23883326](https://pubmed.ncbi.nlm.nih.gov/23883326/)

6. Botteman MF, Pashos CL, Hauser RS, Laskin BL, Redaelli A. Quality of life aspects of bladder cancer: a review of the literature. *Qual Life Res.* 2003; 12: 675–688. PMID: [14516177](#)
7. Månsson Å, Månsson W. When the bladder is gone: quality of life following different types of urinary diversion. *World J Urol.* 1999; 17: 211–218. PMID: [10460403](#)
8. Cella D. Quality of life in patients with metastatic renal cell carcinoma: the importance of patient-reported outcomes. *Cancer Treat Rev.* 2009; 35: 733–737. doi: [10.1016/j.ctrv.2009.07.003](#) PMID: [19699588](#)
9. Yang YL, Liu L, Wang Y, Wu H, Yang XS, Wang JN, et al. The prevalence of depression and anxiety among Chinese adults with cancer: a systematic review and meta-analysis. *BMC Cancer.* 2013; 13: 393. doi: [10.1186/1471-2407-13-393](#) PMID: [23967823](#)
10. Kwekkeboom KL, Seng JS. Recognizing and responding to post-traumatic stress disorder in people with cancer. *Oncol Nurs Forum.* 2002; 29: 643–650. PMID: [12011911](#)
11. Mitchell AJ, Chan M, Bhatti H, Halton M, Grassi L, Johansen C, et al. Prevalence of depression, anxiety, and adjustment disorder in oncological, haematological, and palliative-care settings: a meta-analysis of 94 interview-based studies. *Lancet Oncol.* 2011; 12: 160–174. doi: [10.1016/S1470-2045\(11\)70002-X](#) PMID: [21251875](#)
12. Massie MJ. Prevalence of depression in patients with cancer. *J Natl Cancer Inst Monogr.* 2004; 32: 57–71. PMID: [15263042](#)
13. Reiche EMV, Nunes SOV, Morimoto HK. Stress, depression, the immune system and cancer. *Lancet Oncol.* 2004; 5: 617–625. PMID: [15465465](#)
14. Satin JR, Linden W, Phillips MJ. Depression as a predictor of disease progression and mortality in cancer patients. *Cancer.* 2009; 115: 5349–5361. doi: [10.1002/cncr.24561](#) PMID: [19753617](#)
15. Faller H, Schuler M, Richard M, Heckl U, Weis J, Küffner R. Effects of psycho-oncologic interventions on emotional distress and quality of life in adult patients with cancer: systematic review and meta-analysis. *J Clin Oncol.* 2013; 31: 782–793. doi: [10.1200/JCO.2011.40.8922](#) PMID: [23319686](#)
16. Yang YL, Sui GY, Liu GC, Huang DS, Wang SM, Wang L. The effects of psychological interventions on depression and anxiety among Chinese adults with cancer: a meta-analysis of randomized controlled studies. *BMC Cancer.* 2014; 14: 956. doi: [10.1186/1471-2407-14-956](#) PMID: [25510213](#)
17. Mehnert A, Lehmann C, Graefen M, Huland H, Koch U. Depression, anxiety, post-traumatic stress disorder and health-related quality of life and its association with social support in ambulatory prostate cancer patients. *Eur J Cancer Care.* 2010; 19: 736–745.
18. Pinar G, Okdem S, Buyukgonenc L, Ayhan A. The relationship between social support and the level of anxiety, depression, and quality of life of Turkish women with gynecologic cancer. *Cancer Nurs.* 2012; 35: 229–235. doi: [10.1097/NCC.0b013e31822c47bd](#) PMID: [21946902](#)
19. Kornblith AB, Herndon JE, Zuckerman E, Viscoli CM, Horwitz RI, Cooper MR, et al. Social support as a buffer to the psychological impact of stressful life events in women with breast cancer. *Cancer.* 2001; 91: 443–454. PMID: [11180093](#)
20. Tan M, Karabulutlu E. Social support and hopelessness in Turkish patients with cancer. *Cancer Nurs.* 2005; 28: 236–240. PMID: [15915069](#)
21. Akechi T, Okuyama T, Suqawara Y, Nakano T, Shima Y, Uchitomi Y. Major depression, adjustment disorders, and post-traumatic stress disorder in terminally ill cancer patients: associated and predictive factors. *J Clin Oncol.* 2004; 22: 1957–1965. PMID: [15143090](#)
22. Hann D, Baker F, Denniston M, Gesme D, Reding D, Flynn T, et al. The influence of social support on depressive symptoms in cancer patients: age and gender differences. *J Psychosom Res.* 2002; 52: 279–283. PMID: [12023124](#)
23. Yang YL, Liu L, Wang XX, Wang Y, Wang L. Prevalence and associated positive psychological variables of depression and anxiety among Chinese cervical cancer patients: a cross-sectional study. *PLoS One.* 2014; 9: e94804. doi: [10.1371/journal.pone.0094804](#) PMID: [24722558](#)
24. Snyder CR, Harris C, Anderson JR, Holleran SA, Irving LM, Sigmon ST, et al. The will and the ways: development and validation of an individual differences measure of hope. *J Pers Soc Psychol.* 1991; 60: 570–585. PMID: [2037968](#)
25. Butt CM. Hope in adults with cancer: state of the science. *Oncol Nurs Forum.* 2011; 38: E341–E350. doi: [10.1188/11.ONF.E341-E350](#) PMID: [21875830](#)
26. Zenger M, Brix C, Borowski J, Stolzenburg JU, Hinz A. The impact of optimism on anxiety, depression and quality of life in urogenital cancer patients. *Psychooncology.* 2010; 19: 879–886. doi: [10.1002/pon.1635](#) PMID: [19862795](#)
27. Scheier MF, Carver CS. Optimism, coping and health: assessment an implications of generalized outcome expectancies. *Health Psychol.* 1985; 4: 219–247. PMID: [4029106](#)

28. Min JA, Yoon S, Lee CU, Chae JH, Lee C, Song KY, et al. Psychological resilience contributes to low emotional distress in cancer patients. *Support Care Cancer*. 2013; 21: 2469–2476. doi: [10.1007/s00520-013-1807-6](https://doi.org/10.1007/s00520-013-1807-6) PMID: [23604453](https://pubmed.ncbi.nlm.nih.gov/23604453/)
29. Rowland JH, Baker F. Introduction: resilience of cancer survivors across the lifespan. *Cancer*. 2005; 104: 2543–2548.
30. Radloff LS. The CES-D Scale: a self-report depression scale for research in the general population. *Appl Psychol Meas*. 1977; 1: 385–401.
31. Bodurka-Bervers D, Basen-Enquist K, Carmack CL, Fitzgerald MA, Wolf JK, de Moor C, et al. Depression, anxiety, and quality of life in patients with epithelial ovarian cancer. *Gynecol Oncol*. 2000; 78: 302–308. PMID: [10985884](https://pubmed.ncbi.nlm.nih.gov/10985884/)
32. Zung WWK. A rating instrument for anxiety disorders. *Psychosomatics*. 1971; 12: 371–379. PMID: [5172928](https://pubmed.ncbi.nlm.nih.gov/5172928/)
33. Guo Z, Tang HY, Li H, Tan SK, Feng KH, Huang YC, et al. The benefits of psychosocial interventions for cancer patients undergoing radiotherapy. *Health Qual Life Outcomes*. 2013; 11: 121. doi: [10.1186/1477-7525-11-121](https://doi.org/10.1186/1477-7525-11-121) PMID: [23866850](https://pubmed.ncbi.nlm.nih.gov/23866850/)
34. Sharpley CF, Bitsika V, Christie DRH. Understanding the causes of depression among prostate cancer patients: development of the effects of prostate cancer on lifestyle questionnaire. *Psychooncology*. 2009; 18: 162–168. doi: [10.1002/pon.1382](https://doi.org/10.1002/pon.1382) PMID: [18613289](https://pubmed.ncbi.nlm.nih.gov/18613289/)
35. Weathers FW, Litz BT, Herman DS, Huska JA, Keane TM. The PTSD Checklist-Civilian Version (PCL-C). Boston MA: National Center for PTSD; 1994.
36. Cordova MJ, Giese-Davis J, Golant M, Kronenwetter C, Chang V, Spiegel D. Breast cancer as trauma: posttraumatic stress and posttraumatic growth. *J Clin Psychol Med Settings*. 2007; 14: 308–319.
37. Shelby RA, Golden-Kreutz DM, Andersen BL. Mismatch of posttraumatic stress disorder (PTSD) symptoms and DSM-IV symptom clusters in a cancer sample: exploratory factor analysis of the PTSD Checklist-Civilian Version. *J Trauma Stress*. 2005; 18: 347–357. PMID: [16281232](https://pubmed.ncbi.nlm.nih.gov/16281232/)
38. Zimet GD, Dahlemet NW, Zimet S, Farley GK. The multidimensional scale of perceived social support. *J Pers Assess*. 1988; 52: 30–41.
39. Cicero V, Lo Coco G, Gullo S, Lo Verso G. The role of attachment dimensions and perceived social support in predicting adjustment to cancer. *Psychooncology*. 2009; 18: 1045–1052. doi: [10.1002/pon.1390](https://doi.org/10.1002/pon.1390) PMID: [19195009](https://pubmed.ncbi.nlm.nih.gov/19195009/)
40. Rajandram RK, Ho SM, Samman N, Chan N, McGrath C, Zwahlen RA. Interaction of hope and optimism with anxiety and depression in a specific group of cancer survivors: a preliminary study. *BMC Res Notes*. 2011; 4: 519. doi: [10.1186/1756-0500-4-519](https://doi.org/10.1186/1756-0500-4-519) PMID: [22123081](https://pubmed.ncbi.nlm.nih.gov/22123081/)
41. Wagnild GM. The Resilience Scale user's guide for the US English version of the Resilience Scale and the 14-Item Resilience Scale (RS-14). Montana: The Resilience Center; 2009.
42. Tian J, Hong JS. Validation of the Chinese version of the Resilience Scale and its cutoff score for detecting low resilience in Chinese cancer patients. *Support Care Cancer*. 2013; 21: 1497–1502. doi: [10.1007/s00520-012-1699-x](https://doi.org/10.1007/s00520-012-1699-x) PMID: [23274927](https://pubmed.ncbi.nlm.nih.gov/23274927/)
43. Hirschfeld RMA. Comorbidity of major depression and anxiety disorders: recognition and management in primary care. *Prim Care Companion J Clin Psychiatry*. 2001; 3: 244–254. PMID: [15014592](https://pubmed.ncbi.nlm.nih.gov/15014592/)
44. Fann JR, Thomas-Rich AM, Katon WJ, Cowley D, Pepping M, McGregor BA, et al. Major depression after breast cancer: a review of epidemiology and treatment. *Gen Hosp Psychiatry*. 2008; 30: 112–126. doi: [10.1016/j.genhosppsy.2007.10.008](https://doi.org/10.1016/j.genhosppsy.2007.10.008) PMID: [18291293](https://pubmed.ncbi.nlm.nih.gov/18291293/)
45. Sharpley CF, Christie DRH. An analysis of the psychometric profile and frequency of anxiety and depression in Australian men with prostate cancer. *Psychooncology*. 2007; 16: 660–667. PMID: [17086572](https://pubmed.ncbi.nlm.nih.gov/17086572/)
46. Demyttenaere K, Bruffaerts R, Posada-Villa J, Gasquet I, Kovess V, Lepine JP, et al. Prevalence, severity, and unmet need for treatment of mental disorders in the World Health Organization World Mental Health Surveys. *JAMA*. 2004; 291: 2581–2590. PMID: [15173149](https://pubmed.ncbi.nlm.nih.gov/15173149/)
47. Martire LM, Lustiq AP, Schulz R, Miller GE, Helgeson VS. Is it beneficial to involve a family member? A meta-analysis of psychosocial interventions for chronic illness. *Health Psychol*. 2004; 23: 599–611. PMID: [15546228](https://pubmed.ncbi.nlm.nih.gov/15546228/)
48. Lebel S, Devins GM. Stigma in cancer patients whose behavior may have contributed to their disease. *Future Oncol*. 2008; 4: 717–733. doi: [10.2217/14796694.4.5.717](https://doi.org/10.2217/14796694.4.5.717) PMID: [18922128](https://pubmed.ncbi.nlm.nih.gov/18922128/)
49. Bellmunt J, Orsola A, Leow JJ, Wiegel T, De Santis M, Horwich A. Bladder cancer: ESMO Practice Guidelines for diagnosis, treatment and follow-up. *Ann Oncol*. 2010; 21: v134–v136. doi: [10.1093/annonc/mdq175](https://doi.org/10.1093/annonc/mdq175) PMID: [20555063](https://pubmed.ncbi.nlm.nih.gov/20555063/)



50. Molina Y, Yi JC, Martinez-Gutierrez J, Reding KW, Yi-Frazier JP, Rosenberg AR. Resilience among patients across the cancer continuum. *Clin J Oncol Nurs*. 2014; 18: 93–101. doi: [10.1188/14.CJON.93-101](https://doi.org/10.1188/14.CJON.93-101) PMID: [24476731](https://pubmed.ncbi.nlm.nih.gov/24476731/)
51. Lee V, Cohen SR, Edgar L, Laizner AM, Gagnon AJ. Meaning-making intervention during breast or colorectal cancer treatment improves self-esteem, optimism, and self-efficacy. *Soc Sci Med*. 2006; 62: 3133–3145. PMID: [16413644](https://pubmed.ncbi.nlm.nih.gov/16413644/)
52. Berendes D, Keefe FJ, Somers TJ, Kothadia SM, Porter LS, Cheavens JS. Hope in the context of lung cancer: relationships of hope to symptoms and psychological distress. *J Pain Symptom Manage*. 2010; 40: 174–182. doi: [10.1016/j.jpainsymman.2010.01.014](https://doi.org/10.1016/j.jpainsymman.2010.01.014) PMID: [20579840](https://pubmed.ncbi.nlm.nih.gov/20579840/)
53. Cohen L, de Moor C, Amato RJ. The association between treatment-specific optimism and depressive symptomatology in patients enrolled in a Phase I cancer clinical trial. *Cancer*. 2001; 91: 1949–1955. PMID: [11346878](https://pubmed.ncbi.nlm.nih.gov/11346878/)
